# Supplementary material for: Endocrine and Metabolic Impact of Oral Ingestion of a Carob-Pod-Derived Natural-Syrup-Containing D-Pinitol: Potential Use as a Novel Sweetener in Diabetes
Source: MDPI journal article supplement (doi:10.3390/pharmaceutics14081594), 2022-07-30
Supplement: s1 [file s1]

## SUPPLEMENTARY MATERIALS

### Endocrine and metabolic impact of oral ingestion of a carob-pod derived natural syrup containing D-Pinitol: potential use as a novel sweetener in diabetes

Juan A. Navarro <sup>1,2</sup>, Juan Decara <sup>1</sup>, Dina Medina-Vera <sup>1,2,3,4</sup>, Ruben Tovar <sup>1,2</sup>, Antonio J. Lopez-Gambero <sup>1,4</sup>, Juan Suarez <sup>1,6</sup>, Francisco Javier Pavón <sup>1,3</sup>, Antonia Serrano <sup>1</sup>, Marialuisa de Ceglia <sup>1</sup>, Carlos Sanjuan <sup>5</sup>, Elena Baixeras <sup>7,\*</sup>, Fernando Rodríguez de Fonseca <sup>1</sup>

**SUPPLEMENTARY TABLE S1.**

Primer references for TaqMan® Gene Expression Assays (Applied Biosystems).

| Gene description       | Assay ID      | Nº accession GenBank | Amplicon Length |
|------------------------|---------------|----------------------|-----------------|
| <b>Target genes</b>    |               |                      |                 |
| <i>Fbp1</i>            | Rn00561189_m1 | NM_012558.3          | 77              |
| <i>G6pc</i>            | Rn00689876_m1 | NM_013098.2          | 64              |
| <i>Pc</i>              | Rn00562534_m1 | NM_012744.2          | 97              |
| <i>Pck1</i>            | Rn01529014_m1 | NM_198780.3          | 87              |
| <i>Pklr</i>            | Rn01455286_m1 | NM_012624.3          | 58              |
| <i>Fasn</i>            | Rn01463550_m1 | NM_017332.1          | 148             |
| <i>Acox1</i>           | Rn01460628_m1 | NM_017340.2          | 63              |
| <i>Acaca</i>           | Rn00573474_m1 | NM_022193.1          | 60              |
| <i>Cox4i1</i>          | Rn00665001_g1 | NM_017202.1          | 72              |
| <i>Cox4i2</i>          | Rn00585003_m1 | NM_053472.1          | 59              |
| <i>Scd1</i>            | Rn00594894_g1 | NM_139192.2          | 86              |
| <i>Cpt1a</i>           | Rn00580702_m1 | NM_031559.2          | 64              |
| <b>Reference genes</b> |               |                      |                 |
| <i>Actb</i>            | Rn00667869_m1 | NM_031144.3          | 91              |

SUPPLEMENTARY FIGURE S1

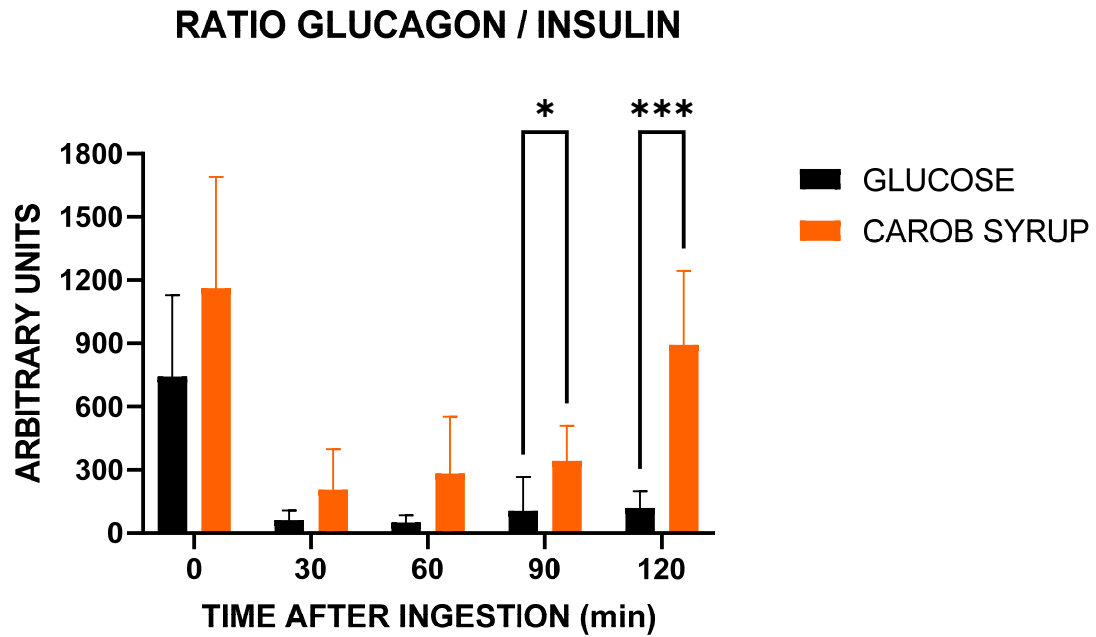

Acute effects on plasma glucagon/insulin ratio in human voluntary subjects of 1) a single oral dose of a glucose solution (50 gr in a 100 ml of water) or 2) a natural carob pod-derived syrup (Innosweet®, 50 gr of carbohydrates in 100 ml water, containing equal amounts of glucose and fructose, and 1600 mg of D-Pinitol). Data are means  $\pm$  standard error of the mean of 8 subjects for glucose and 9 subjects for carob syrup. (\*)  $P < 0.05$ , (\*\*\*)  $P < 0.001$  carob syrup *versus* glucose group.

SUPPLEMENTARY FIGURE S2

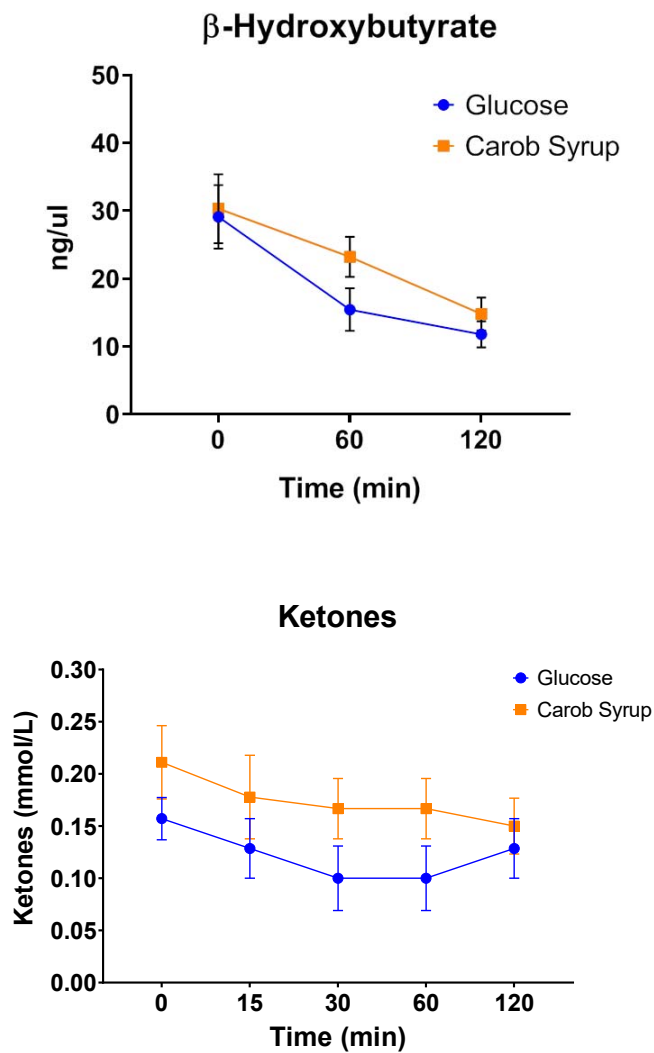

Acute effect on plasma  $\beta$ -hydroxybutyrate and plasma ketone levels levels in human voluntary subjects receiving 1) a single oral dose of a glucose solution (50 gr in a 100 ml of water) or 2) a natural carob pod-derived syrup (Innosweet®, 50 gr of carbohydrates in 100 ml water, containing equal amounts of glucose and fructose, and 1600 mg of D-Pinitol). Data are means  $\pm$  standard error of the mean of 8 subjects for glucose and 9 subjects for carob syrup.

### SUPPLEMENTARY FIGURE S3.

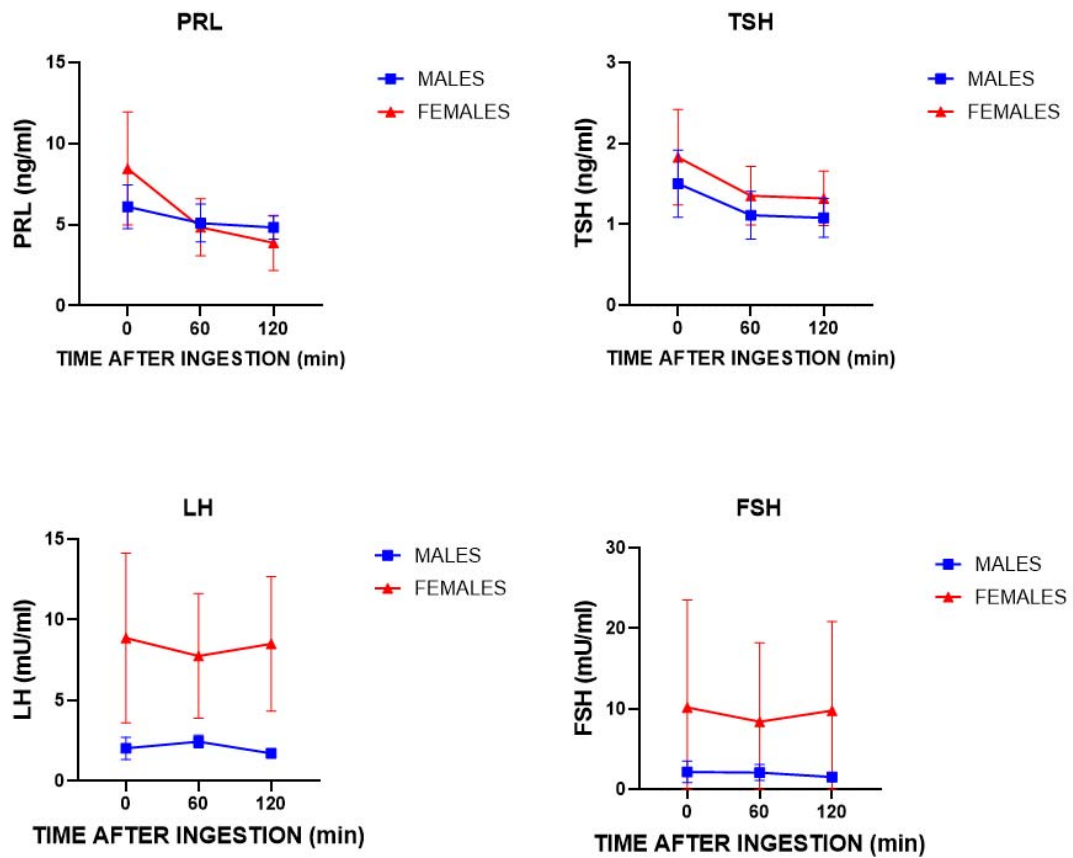

Acute effect in human voluntary subjects of a single oral dose of a natural carob pod-derived syrup (Innosweet®, 50 gr of carbohydrates in 100 ml water, containing equal amounts of glucose and fructose, and 1600 mg of D-Pinitol) on plasma pituitary hormones in male and randomly cycling female human subject: Prolactin (PRL), Thyroid-stimulating hormone (TSH), Follicle-stimulating hormone (FSH) and Luteinizing hormone (LH). Data are means  $\pm$  standard error of the mean of 9 subjects for carob syrup.

SUPPLEMENTARY FIGURE S4

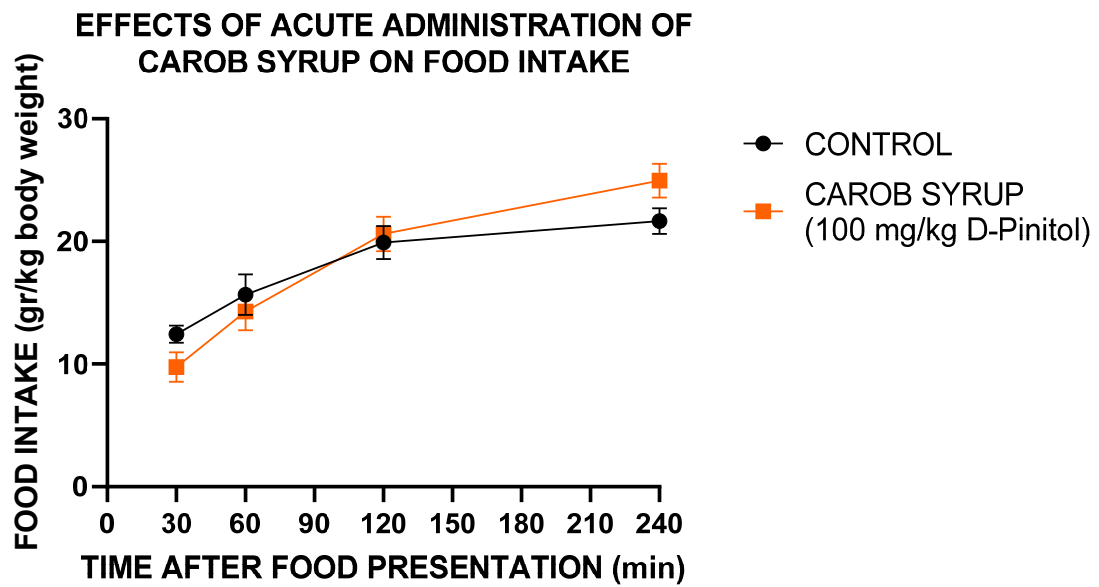

Acute effects a single oral dose of a natural carob pod-derived syrup (Innosweet®, 100 mg/ml, dissolved in 1 ml of water) or 1 ml of water (Control), in animals food deprived for 18 hr. Data are means  $\pm$  standard error of the mean of cumulative food intaken along a period of 4 hr (8 animals for control group, 9 subjects for carob syrup).

**Supplementary Table S2.** Plasma and Liver Biochemistry Parameters after 10 days of drinking **water** , or water-diluted **D-Pinitol** (equivalent to 100 mg/kg b.w. /day of D-Pinitol).

|                                     | Water            | D-Pinitol                            |
|-------------------------------------|------------------|--------------------------------------|
| N                                   | 10               | 10                                   |
| Glucose (mg/dl)                     | 247.0 $\pm$ 63.8 | 269.4 $\pm$ 46.3                     |
| Creatinin (mg/dl)                   | 0.57 $\pm$ 0.38  | 0.70 $\pm$ 0.10                      |
| Urea (mg/dl)                        | 21.6 $\pm$ 3.2   | <b>41.8 <math>\pm</math> 2.8 (*)</b> |
| Bilirubin (mg/dl)                   | 0.10 $\pm$ 0.09  | 0.10 $\pm$ 0.02                      |
| Uric Acid (mg/dl)                   | 1.67 $\pm$ 0.29  | 1.90 $\pm$ 0.17                      |
| Triglycerides (mg/dl)               | 146.9 $\pm$ 30.1 | 131.1 $\pm$ 9.39                     |
| $\beta$ -Hydroxy butirate (mg/dl)   | 1005 $\pm$ 86    | 1057 $\pm$ 90.8                      |
| AST (U/L)                           | 152.6 $\pm$ 46.5 | 254.6 $\pm$ 33.18                    |
| Insulin (ng/ml))                    | 14.9 $\pm$ 1.9   | 14.5 $\pm$ 0.9                       |
| Glucagon/Insulin ratio              | 26.6 $\pm$ 4.9   | 37.3 $\pm$ 11.9                      |
| Leptin (ng/ml)                      | 14.8 $\pm$ 4.6   | 12.6 $\pm$ 3.4                       |
| Ghrelin (ng/ml)                     | 0.42 $\pm$ 0.13  | 0.53 $\pm$ 0.14                      |
| TBARS (Malonyl dialdehyde, $\mu$ M) | 11.1 $\pm$ 2.7   | 8.94 $\pm$ 1.09                      |
| Total Fat in Liver (mg/g)           | 40.8 $\pm$ 1.3   | <b>30.4 <math>\pm</math> 6.9 (*)</b> |
| Liver Glycogen ( $\mu$ g/g)         | 137.7 $\pm$ 34.1 | 107.8 $\pm$ 10.6                     |

Data are means  $\pm$  Standard Deviation. (\*) indicates  $p < 0.05$ , ANOVA or Kruskal-Wallis test.

AST (Aspartate aminotransferase), TBARS (Tiobarbituric acid reactive species).

**SUPPLEMENTARY FIGURE S5.**

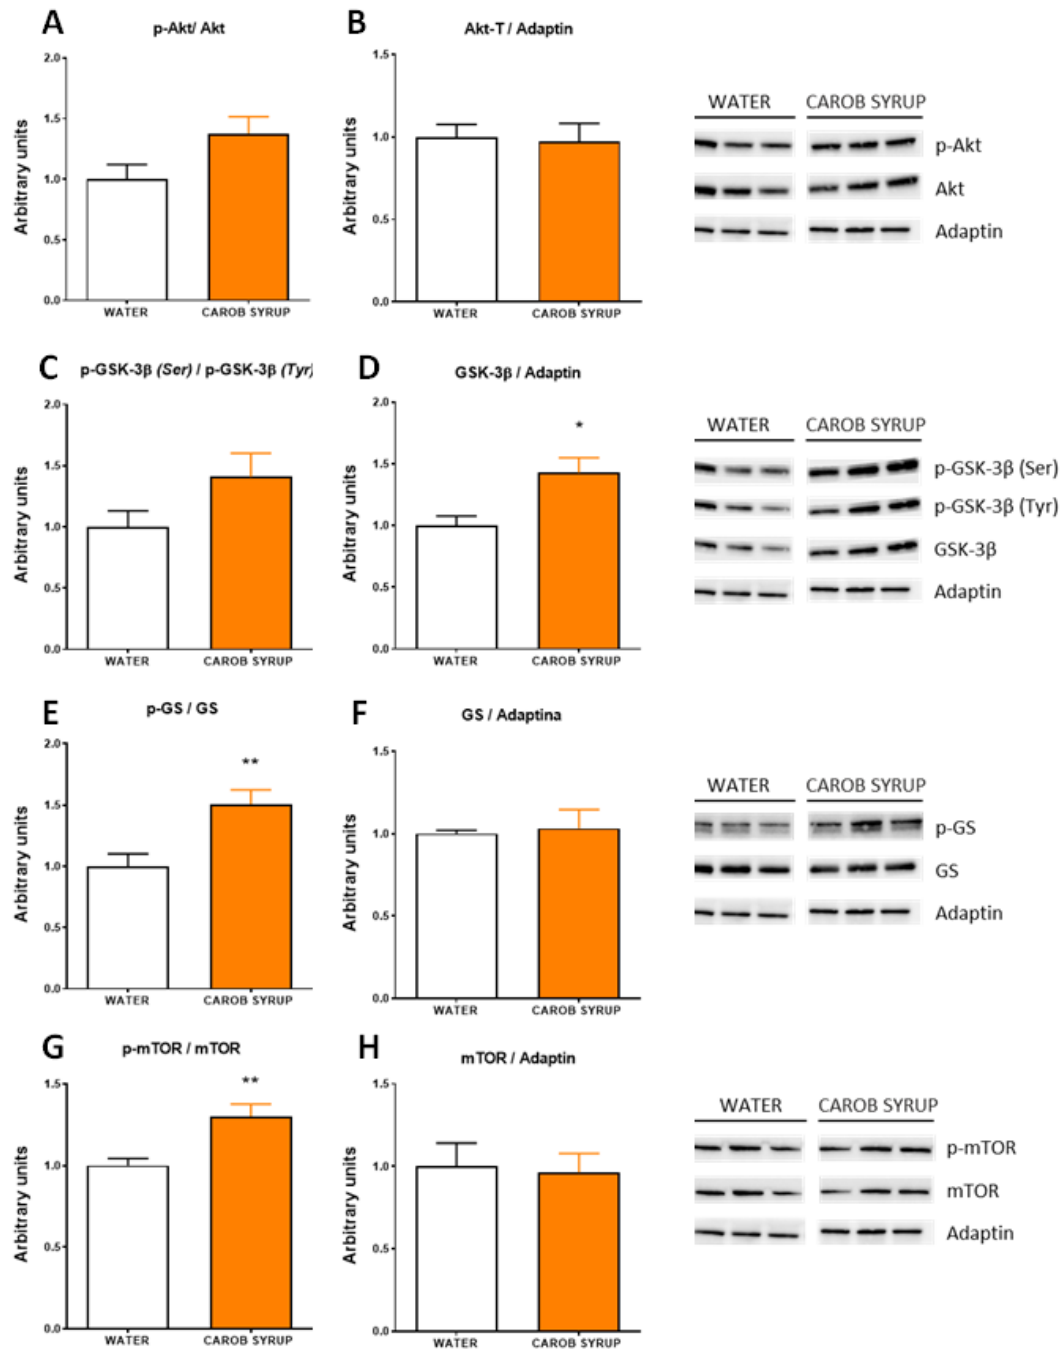

Effects of repeated administration for 10 days of a carob syrup administered in the drinking water on hypothalamus insulin signaling cascade measured by western blot analysis. (A) Phospho-protein kinase b/AKT (p-AKT), (B) protein kinase b/AKT (AKT), (C) Ratio Serine-phosphorylated glycogen synthase kinase 3  $\beta$  (p-GSK3  $\beta$ )(Ser) to Tyrosine-phosphorylated glycogen synthase kinase 3  $\beta$  (p-GSK3  $\beta$ )(Tyr)), (GSK3  $\beta$ )(Ser)/ p-GSK3  $\beta$ (Tyr)) (D) Total GSK3  $\beta$ , (E) Phospho-glycogen synthase (pGS), (F) Total Glycogen synthase (GS), (G) Phospho-mammalian target of rapamycin (p-mTOR) and (G) Mammalian target of rapamycin (mTOR). Data are means or adaptin-normalized band densities  $\pm$  standard errors of the mean of 5-8 determinations per group. (\*)  $P < 0.05$ , (\*\*)  $P < 0.01$  carob syrup *versus* water drinking control animals.
